# Population coupling predicts the plasticity of stimulus responses in cortical circuits

**Yann Sweeney**

Department of Bioengineering  
Imperial College London  
y.sweeney@imperial.ac.uk

**Claudia Clopath**

Department of Bioengineering  
Imperial College London  
c.clopath@imperial.ac.uk

## Abstract

1 Long-term imaging of sensory cortex reveals a diverse range of stimulus response  
2 stability: some neurons retain stimulus responses that are stable over days whereas  
3 other neurons have highly plastic stimulus responses. Using a recurrent network  
4 model, we explore whether this observation could be due to an underlying diversity  
5 in the synaptic plasticity of neurons. We find that, in a network with diverse  
6 learning rates, neurons with fast rates are more coupled to population activity than  
7 neurons with slow rates. This phenomenon, which we call a plasticity-coupling  
8 link, surprisingly predicts that neurons with high population coupling exhibit more  
9 long-term stimulus response variability than neurons with low population coupling.  
10 We substantiate this prediction using recordings from the Allen Brain Observatory  
11 which track the orientation preferences of 15,000 neurons in mouse visual cortex.  
12 In agreement with our model, a neuron's population coupling is correlated with  
13 the plasticity of its orientation preference. Finally, we show that high population  
14 coupling helps plastic neurons alter their stimulus preference during a simple  
15 perceptual learning task, but hinders the ability of stable neurons to provide an  
16 instructive signal for learning. This suggests a particular functional architecture: a  
17 stable 'backbone' of stimulus representation formed by neurons with slow synaptic  
18 plasticity and low population coupling, on top of which lies a flexible substrate of  
19 neurons with fast synaptic plasticity and high population coupling.

20 **Keywords:** Network models, Synaptic plasticity, Stimulus representation

## 21 Introduction

22 The brain encodes information about the external world via its neural activity. One aspect of such  
23 encoding is that neurons in sensory cortex often have a preferred stimulus which evokes a stronger  
24 response than other stimuli. These stimulus responses can change during learning or adaptation: if a  
25 particular stimulus feature is overexpressed within an environment, for example, more neurons will  
26 be recruited to encode this feature (Sengpiel et al., 1999). Advances in neural imaging techniques  
27 allow us to interrogate such changes by tracking stimulus responses of hundreds of neurons over  
28 many days in vivo (Andermann, 2010; Mank et al., 2008). These recordings reveal a substantial, and  
29 puzzling, variability in the long-term stability of responses in sensory cortex: some neurons retain  
30 highly stable preferences to specific stimuli, whereas the stimulus preference of other neurons change  
31 from day to day (Ranson, 2017; Clopath and Rose, 2017; Rose et al., 2016; Poort et al., 2015; Lütcke  
32 et al., 2013). The degree of stimulus response stability typically depends on brain region; whisking  
33 responses in mouse barrel cortex are highly plastic, whereas visual responses in mouse V1 are more  
34 stable but still exhibit fluctuations (Clopath and Rose, 2017; Lütcke et al., 2013). Moreover, it is  
35 possible to induce stimulus response plasticity through perturbations such as sensory deprivation  
36 (Rose et al., 2016), or to increase task-related stimulus response stability through rewarded learning  
37 (Poort et al., 2015).

38 Current theories which address the long-term variability of stimulus responses primarily ask how  
39 motor learning occurs with unstable representations (Driscoll et al., 2017; Ajemian et al., 2013; Rokni  
40 et al., 2007), or seek to explain it as a form of probabilistic sampling (Kappel et al., 2017, 2015).  
41 Although the stability of neural representation is correlated with firing rate in hippocampal place cells  
42 (Grosmark and Buzsaki, 2016) and in visual cortex (Ranson, 2017), it is not known how cellular or  
43 network properties influence a neuron's stimulus response stability (Clopath and Rose, 2017). We are  
44 therefore lacking a theory of why some neurons' stimulus responses are more stable than others, and  
45 how this affects perception and learning. By investigating how synaptic plasticity mediates stimulus  
46 response variability, we aim here to establish how this diversity of stimulus response stability emerges,  
47 and whether it is functionally relevant.

48 We propose that the observed diversity of stimulus response stability may be explained by a diversity  
49 of neurons' inherent plasticity (or learning rate) within a network. Consequently, we explore how  
50 diverse learning rates across neurons impact synaptic connectivity in a recurrent network model of  
51 mouse visual cortex. We find that neurons with fast learning rates exhibit more variability of their  
52 stimulus selectivity than neurons with slow learning rates. Intriguingly, we also find that fast neurons  
53 have higher population coupling, a measure of how correlated an individual neurons activity is with  
54 the rest of the population (Okun et al., 2015).

55 This unexpected plasticity-coupling link, in which more plastic neurons are also more coupled to the  
56 rest of the population, provides a mechanism for the diverse population coupling previously observed  
57 in sensory cortex (Okun et al., 2015). Moreover, the plasticity-coupling link predicts that neurons  
58 with high population coupling exhibit more long-term stimulus response variability than neurons  
59 with low population coupling. We substantiate this prediction with *in vivo* calcium imaging of mouse  
60 visual cortex from the Allen Brain Observatory (ABI, 2016), finding that a neuron is more likely to  
61 exhibit variability of its orientation preference if it has high population coupling.

62 Finally, we explore the functional implications of both diverse population coupling and diverse  
63 learning rates within our network model. We find that strong population coupling helps plastic  
64 neurons alter their stimulus preference during a simple perceptual learning task, but hinders the ability  
65 of stable neurons to provide an instructive signal for learning. The plasticity-coupling link exploits  
66 this dependence by ensuring that highly plastic neurons - the substrate for perceptual learning - are  
67 strongly coupled to the population, while less plastic neurons are weakly coupled and act as a stable  
68 'backbone' of stimulus representation.

## 69 Results

### 70 2.1 A 'plasticity-coupling link' emerges in networks with diverse learning rates: fast 71 neurons have higher population coupling than slow neurons

72 Our aim is to explore whether the diversity of stimulus response stability can be explained by  
73 a diversity of neurons' inherent plasticity (or learning rate) within a network. To this end, we

74 use network simulations to characterise the impact of diverse learning rates on recurrent synaptic  
75 connectivity in sensory cortex.

76 We first explore the impact of diverse learning rates in a simple, fully connected network of rate  
77 neurons (Figure 1A, Methods). Excitatory recurrent synapses in our network undergo Hebbian  
78 plasticity and synaptic scaling, while inhibitory synapses undergo homeostatic inhibitory plasticity  
79 (Vogels et al., 2011). Extending traditional models of Hebbian plasticity in which synaptic weight  
80 updates depend only on the correlation of pre- and post-synaptic activity, we introduce diversity by  
81 assigning either a fast or slow Hebbian learning rate ( $\alpha$ ) to individual neurons. The learning rate is  
82 expressed postsynaptically, such that the synaptic input weights onto neurons with a large  $\alpha$  are more  
83 plastic than those with a small  $\alpha$  (Equation 3).

84 Each neuron receives feedforward input from 1 of 4 possible visual stimuli representing gratings of  
85 different orientations, and independent noise. The Hebbian plasticity rule potentiates connections  
86 between neurons which share the same feedforward stimulus preference, due to their coactivity. This  
87 drives the emergence of strong bidirectional connections amongst stimulus-specific groups of neurons,  
88 while the remaining non-specific connections weaken (Figure 1B,C) (Ko et al., 2013; Clopath et al.,  
89 2010). Fast neurons develop these strong, specific connections sooner than slow neurons (Figure 1B,  
90 solid lines). However, the increased learning rate also leads to stronger synaptic weight fluctuations.  
91 These fluctuations occur both for synapses from neurons which share stimulus preference (specific  
92 connections) and for synapses from neurons which have different stimulus preference (non-specific  
93 connections). For slow neurons, in contrast, non-specific and specific connections tend towards either  
94 zero or the maximum synaptic weights respectively, remaining relatively stable after convergence  
95 (Figure 1B, black lines). This leads to connection specificity that is stronger and more stable compared  
96 with fast neurons (Figure 1D).

97 The observed dependence of connection specificity on learning rate is conserved if, instead of just two  
98 values of  $\alpha$  representing either fast or slow neurons, we simulate plasticity in a network of neurons  
99 with a diverse range of  $\alpha$  (Figure 1E). Increasing  $\alpha$  predominantly drives an increase in non-specific  
100 connections rather than a decrease in specific connections. This leads to an overall increase in the  
101 amount of synaptic input amongst neurons with high  $\alpha$ .

102 Population coupling is a recently characterised feature of neural activity which describes how  
103 correlated a neuron's activity is with the overall population activity, and which can be measured  
104 from calcium imaging recordings of neural activity (Okun et al., 2015). Since population coupling  
105 is correlated with the amount of local synaptic input in cortical networks (Okun et al., 2015), this  
106 measure could be a useful and experimentally observable proxy for the specificity of recurrent  
107 connectivity in our networks. We therefore investigate its suitability by measuring the population  
108 coupling of neurons in our network after synaptic plasticity (Methods). Interestingly, population  
109 coupling increases with learning rate, closely following the dependence of non-specific connectivity  
110 on  $\alpha$  (Figure 1E, red points).

111 The dependence of a neuron's population coupling on its learning rate  $\alpha$ , which we call a 'plasticity-  
112 coupling link', could provide a framework for relating the functional role of a neuron within a  
113 network to its dynamics. We therefore explore conditions necessary for this plasticity-coupling link  
114 by embedding a single plastic neuron within a static network and varying key model parameters  
115 (Figure S1). A strong plasticity-coupling link requires both moderate amounts of noise within the  
116 network and relatively slow synaptic scaling compared with Hebbian plasticity, in agreement with  
117 experimental data (Turrigiano et al., 1998). We next investigate whether this plasticity-coupling link  
118 is robustly observed in more biologically detailed networks.

## 119 2.2 Diverse population coupling emerges in cortical networks with diverse learning rates

120 As the plasticity-coupling link is robustly observed in a fully-connected small network with simple  
121 stimulus responses, we next investigate i) whether the plasticity-coupling link is also present in larger  
122 networks which more accurately represent the synaptic connectivity and stimulus response properties  
123 observed in mouse visual cortex, and ii) whether the diverse population coupling observed in sensory  
124 cortex emerges simply by introducing diverse learning rates (Okun et al., 2015).

125 We explore this in a network of 250 excitatory neurons with randomly generated Gabor receptive  
126 fields. This network has been shown to reproduce receptive field correlations and synaptic weight  
127 statistics that are observed in mouse visual cortex (Watanabe et al., 2016; Cossell et al., 2015) (see

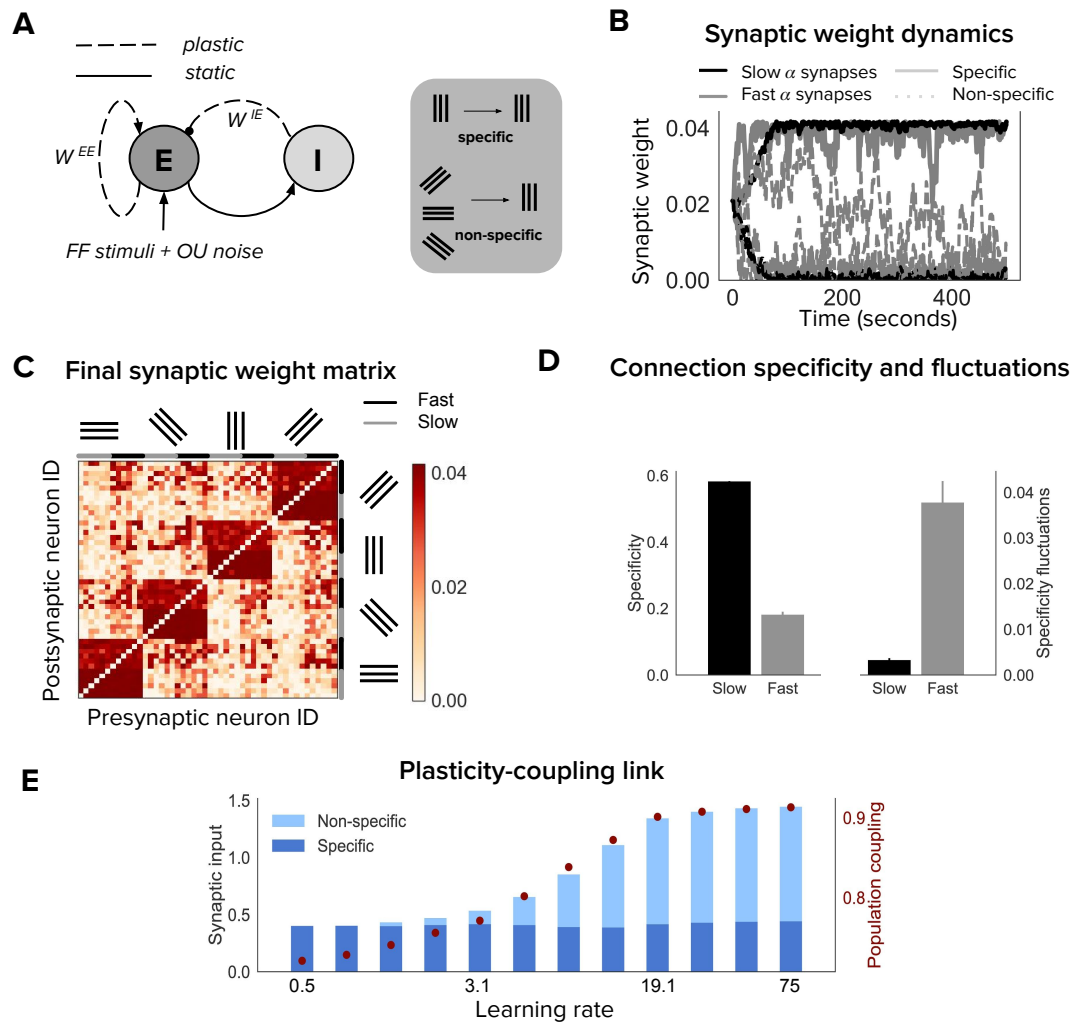

**Figure 1: Neurons with fast learning rates develop more non-specific connections, and higher population coupling, than neurons with slow learning rates** (A) Connection diagram of the recurrent network model with excitatory (E) and inhibitory (I) neurons. Dashed lines denote plastic synapses and solid lines denote static synapses. (B) Synaptic weight dynamics during presentation of random sequences of stimuli to the network. Synaptic inputs onto slow neurons ( $\alpha = 1$ , gray) and onto fast neurons ( $\alpha = 5$ , black). Synapses between neurons which share the same feedforward stimulus preference (specific) have solid lines, and synapses between neurons which have different feedforward stimulus preference (non-specific) have dashed lines. (C) Excitatory synaptic weight matrix of the recurrent network after synaptic plasticity. Neuron IDs are organised by feedforward stimulus preference. For each of the 4 stimulus groups the first 6 neurons are slow ( $\alpha = 1$ ) and the next 6 neurons are fast ( $\alpha = 5$ ). (D) Connection specificity (ratio of specific to non-specific synaptic input strength) after synaptic plasticity for slow and fast neurons (left), and the standard deviation over time of the connection specificity for slow and fast neurons (right). (E) Amount of non-specific (light blue) and specific (dark blue) synaptic input for neurons in a network with diverse learning rates, as the learning rate of the postsynaptic neuron is varied along a logarithmic scale. Population coupling of neurons with different learning rates (red points).

128 Methods section; **Receptive-field based network model**). We compare networks in which there is a  
129 uniform  $\alpha$  across all neurons to networks with diverse  $\alpha$ .

130 Both networks with uniform  $\alpha$  and networks with diverse  $\alpha$  develop strong synaptic connections  
131 between neurons with similar receptive fields. There is, however, a broader range of summed synaptic  
132 inputs in diverse networks, when compared with uniform networks (**Figure 2A**). This occurs because  
133 the total excitatory synaptic input onto a neuron covaries with  $\alpha$  in the diverse network (**Figure 2B**).

134 In agreement with our previous observations, the population coupling of a neuron is determined by its  
135 total excitatory synaptic input (**Figure 2C**, blue line.  $r=0.29$ ,  $p<1e-5$ , Spearman correlation). Diverse  
136 learning rates within a cortical network indeed lead to a broad distribution of population coupling,  
137 as observed by **Okun et al. (2015)** (**Figure 2D**, blue). Although the network with uniform  $\alpha$  also  
138 exhibits some heterogeneity of population coupling, in this network a neuron's population coupling is  
139 not correlated with the amount of synaptic input it receives (**Figure 2C,D**, green.  $p=0.52$ , Spearman  
140 correlation). This contradicts experiments which demonstrate a correlation between synaptic input  
141 and population coupling (**Okun et al., 2015**).

142 We next investigate the long-term variability of stimulus selectivity within both networks by measuring  
143 the fluctuations of neuronal stimulus selectivity throughout a period of synaptic plasticity (**Methods**).  
144 We find that the magnitude of these fluctuations is independent of population coupling in the uniform  
145 network ( $p=0.4$ , Spearman correlation), but is correlated with population coupling in the diverse  
146 network ( $r=0.18$ ,  $p=1e-5$ , Spearman correlation **Figure 2E**).

147 We then characterise the dependence of population coupling and stimulus selectivity on the amplitude  
148 of external input noise, again for networks with either uniform or diverse  $\alpha$  (**Figure 2F**). As the  
149 majority of excitatory synaptic input received by neurons in visual cortex is recurrent, we simulate  
150 a regime with relatively weak feedforward stimulus-related input and high noise for **Figure 2A-E**  
151 (**Cossell et al., 2015**; **Lin et al., 2015**). This results in a broader distribution of population coupling  
152 and weaker stimulus selectivity for networks with diverse  $\alpha$ , compared to networks with uniform  $\alpha$   
153 (**Figure 2F**). The dynamics of cortical activity observed *in vivo* are therefore more closely captured  
154 by networks with diverse  $\alpha$ , compared to networks with uniform  $\alpha$ .

155 Overall, these simulations show that the plasticity-coupling link observed in our small network  
156 model is robust in a larger network with receptive field properties and neuronal responses similar  
157 to mouse visual cortex. Networks with diverse  $\alpha$  exhibit a broader range of population coupling  
158 than networks with uniform  $\alpha$ . Moreover, diverse learning rates introduce a correlation between a  
159 neuron's population coupling and its total excitatory synaptic input, in agreement with experimental  
160 observations (**Okun et al., 2015**). Taken together, diverse learning rates provide a parsimonious  
161 explanation for the diverse population coupling observed in sensory cortical networks.

### 162 **2.3 Experimental validation: population coupling is correlated with stimulus response** 163 **variability in vivo**

164 We have demonstrated that the population coupling of a neuron in a recurrent network model depends  
165 on its inherent plasticity. This plasticity-coupling link predicts a correlation between a neuron's  
166 population coupling and the variability of its stimulus selectivity. We now test this prediction using  
167 2-photon calcium imaging of visual cortex in awake adult mice (**Methods**). The data we analyse is  
168 publicly available and was collected by the Allen Brain Institute **ABI (2016)**. Mice passively viewed  
169 drifting or static gratings, interleaved with natural movies, while the simultaneous responses of  
170  $\sim 15,000$  excitatory neurons from 64 animals were recorded (**Figure 3A**). We measure the population  
171 coupling of each neuron over the entire recording session, and the preferred orientation of each  
172 neuron during the first 10 minutes and last 10 minutes of the experiment (**Methods, Figure 3B**). We  
173 then compare these two measurements of orientation preference to identify whether the preferred  
174 orientation of some neurons vary over the course of the experiment.

175 There is a broad distribution of population coupling, in agreement with previous observations  
176 (**Figure 3C**) (**Sedigh-Sarvestani et al., 2017**; **Okun et al., 2015**). Roughly 60% of neurons express  
177 variability of their preferred orientation between the beginning and the end of the experiment.  
178 The distribution of changes in preferred orientation ( $\Delta ORI_{pref}$ ) is highly skewed towards smaller  
179 magnitudes. (**Figure 3D**).



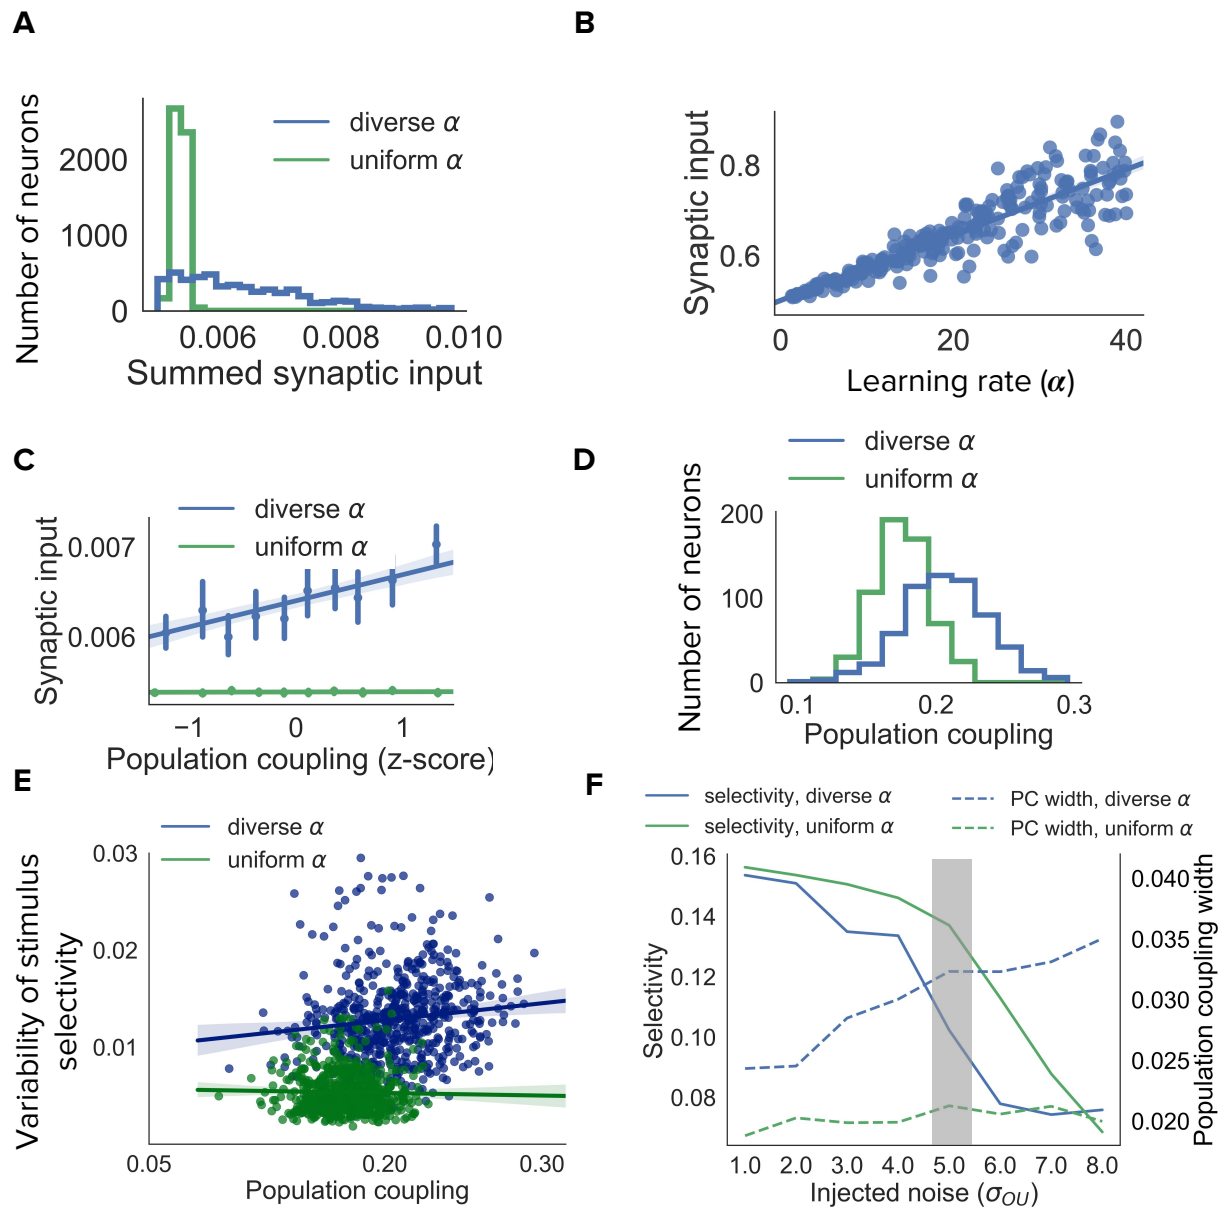

**Figure 2: Diverse population coupling from diverse learning rates in a cortical network model**

(A) Distribution of summed synaptic input onto each neuron in networks with diverse learning rates (blue), and networks with uniform learning rates (green) (B) Mean recurrent excitatory synaptic input received by a neuron correlates with its learning rate,  $\alpha$ . (C) The population coupling of a neuron is correlated with the amount of recurrent synaptic input it receives for the network with diverse learning rates (blue), as opposed to the network with uniform learning rates (green). (D) Diverse population coupling occurs in our recurrent network model. The population coupling distribution is wider for networks with diverse learning rates (blue) compared to networks with uniform learning rates (green,  $p < 1e-5$ , Levene test). (E) The variability of stimulus selectivity is correlated with population coupling in networks with diverse learning rates (blue,  $r = 0.18$ ,  $p = 1e-5$ , Spearman correlation), but not in networks with uniform learning rates (green,  $p = 0.4$ , Spearman correlation). (F) Dependence of network properties on the amplitude of injected noise ( $\sigma_{OU}$ ). Stimulus selectivity decreases with increasing  $\sigma_{OU}$  for networks with both diverse and uniform learning rates (blue and green lines, respectively). The distribution of population coupling broadens with increasing noise for networks with diverse learning rates, but not for networks with uniform learning rates (blue and green dashed lines, respectively). Panel A-E use  $\sigma_{OU} = 5.0$  (shaded gray area).

180 Population coupling is weakly but significantly correlated with the average change in preferred  
181 orientation, when pooling together neurons across all experiments (Figure 3E,  $r=0.04$ ,  $p<1e-4$ ,  
182 Spearman correlation). We characterise this dependence for each experiment by comparing the  
183 population coupling of neurons with variable orientation preferences (those with  $\Delta\text{ORI}_{\text{pref}} > 0$ )  
184 versus those with stable orientation preference. While there is substantial variability of the strength  
185 of the effect, the majority of experiments show a trend in which neurons with plastic orientation  
186 preferences have a higher mean population coupling than those with stable orientation preferences  
187 (Figure 3F,  $p<0.001$ , t-test). As the mean activity level of a neuron could conceivably determine its  
188 stimulus preference stability (Ranson, 2017; Grosmark and Buzsaki, 2016), we tested this and found  
189 no dependence of the tendency of a individual neuron to change stimulus preference on its average  
190 calcium fluorescence ( $p=0.17$ , Spearman correlation).

191 (Okun et al., 2015) did not observe any correlations between population coupling of a neuron and its  
192 orientation selectivity. In contrast, our network model predicts that neurons with high population  
193 coupling are less selective than neurons with low population coupling. We tested whether there was  
194 this predicted dependence between population coupling and orientation selectivity in these data. We  
195 indeed found a weak anti-correlation between population coupling and orientation selectivity index  
196 (Figure S2,  $r=-0.05$ ,  $p<1e-6$ , Pearson correlation).

## 197 **2.4 Diverse learning rates maintain both a stable backbone and a flexible substrate of** 198 **stimulus representation**

199 Our analysis thus far explored the impact of diverse rates of plasticity on synaptic connectivity. We  
200 established a link between diverse population coupling and diverse stimulus response variability,  
201 both of which are observed in sensory cortex. We now explore the functional implications of diverse  
202 population coupling and learning rates within recurrent networks. In order to simplify our analysis  
203 we consider both forms of diversity in isolation.

204 The presence of diverse rates of plasticity in a network suggests a dichotomy of roles: less plastic  
205 neurons could form stable stimulus representations while more plastic neurons could allow flexible  
206 representation. This could, for example, be beneficial during perceptual learning. We test this  
207 hypothesis by simulating an extended period of perceptual learning in our small network model  
208 (Methods, Figure 4A). We do this using a simple paradigm in which a randomly chosen feedforward  
209 stimuli is associated with an increased external input. This external input could be mediated by  
210 a reward, or some other top-down signal. Hebbian plasticity potentiates the recurrent synaptic  
211 connections from neurons which are tuned to the stimulus onto all neurons. This increases the  
212 selectivity of all neurons to the associated stimulus (Figure 4A).

213 We evaluate the ability of our network to continually learn these stimulus associations in the case  
214 where  $\alpha$  is slow for all neurons,  $\alpha$  is fast for all neurons, or where there is diverse  $\alpha$  (both slow and  
215 fast) for each feedforward stimulus group.

216 We find that a network with only fast  $\alpha$  quickly learns the stimulus associations (Figure 4A, bot-  
217 tom). However, repeated associations with neurons that do not share feedforward stimuli cause the  
218 specificity of recurrent connectivity to decrease, thus degrading the representation of feedforward  
219 stimuli (Figure 4A, top). Although neurons still form associations with the feedforward stimulus, this  
220 is because we keep the feedforward stimulus weights fixed; one can imagine that this feedforward  
221 selectivity may also degrade if these weights were plastic. Conversely, the network with only slow  
222  $\alpha$  retains a stable representation of the feedforward stimuli but performs poorly in representing the  
223 associated stimulus (Figure 4A). The network with diverse  $\alpha$  overcomes these issues by having fast  
224 neurons which flexibly learn stimulus associations and slow neurons which maintain a ‘backbone’ of  
225 stimulus representation (see diagram, Figure 4B).

## 226 **2.5 The plasticity-coupling link enables efficient perceptual learning**

227 Having demonstrated the advantage of diverse learning rates within a network for perceptual learning,  
228 we now ask whether diverse population coupling has any impact on a network’s performance in  
229 this task. Given the plasticity-coupling link, we are particularly interested in whether the impact of  
230 population coupling on performance is dependent on a neuron’s rate of plasticity. To investigate this,  
231 we choose the extreme case in which there is a single neuron with plastic synaptic inputs embedded in  
232 an otherwise static recurrent network. Since all other synapses in the network are static (see diagram,

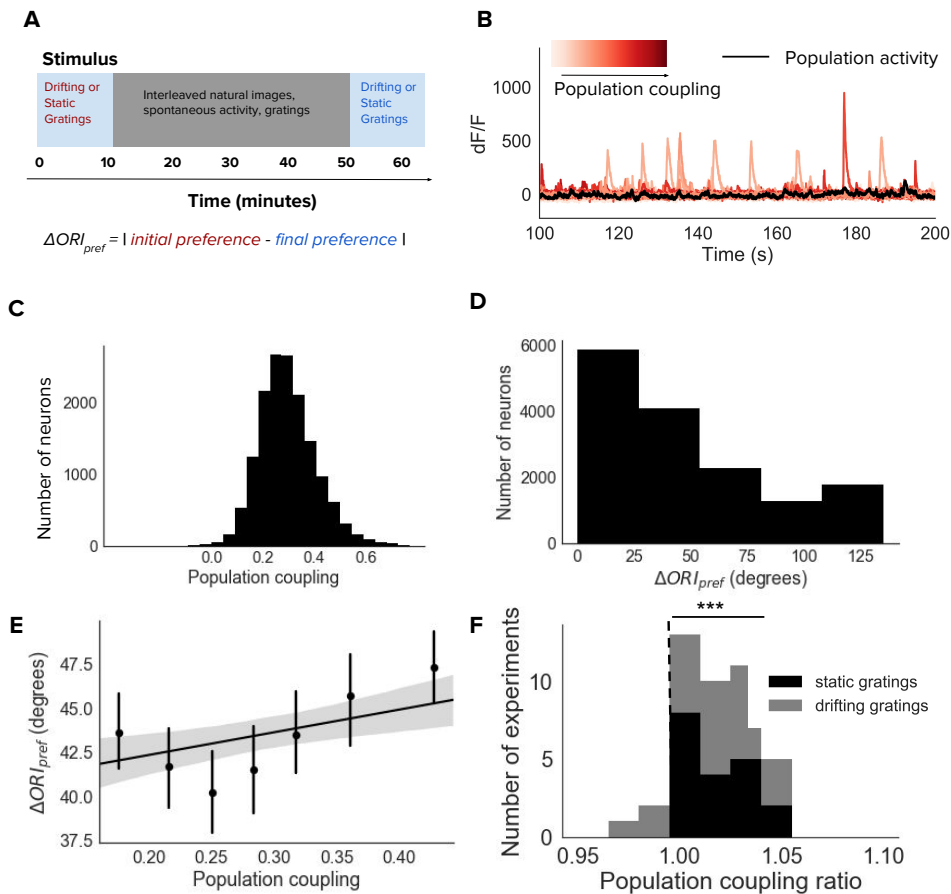

**Figure 3: Population coupling is correlated with stimulus response variability in mouse visual cortex *in vivo*** (A) Diagram of stimulus and data analysis protocol (B) dF/F calcium fluorescence traces of neurons (red traces) in an example experiment from the Allen Brain Observatory. Mean activity is shown in black, and the population coupling of each neuron is indicated by its colour changing from light to dark red with increased population coupling. (C) The population coupling distribution of all neurons across all experiments (64 experiments, 15,281 neurons). (D) Absolute difference in preferred orientation ( $\Delta ORI_{pref}$ ) between the beginning and the end of the recording session. The distribution of  $\Delta ORI_{pref}$  is for all neurons across all experiments (both drifting gratings and static gratings). (E)  $\Delta ORI_{pref}$  is correlated with population coupling ( $r=0.04$ ,  $p<1e-4$ ). Data shown for all neurons across all experiments, binned by population coupling. Linear regression fit for all datapoints (shaded gray area indicates 95% confidence interval). (F) Ratios of the mean population coupling of neurons that change their preferred orientation ( $\Delta ORI_{pref} > 0$ ) versus mean population coupling of neurons that conserve their preferred orientation ( $\Delta ORI_{pref} = 0$ ), for each individual static grating (black) or drifting grating (gray) experiment. Dashed vertical line indicates expected value if a neuron's orientation preference variability is not dependent on its population coupling (\*\*\*)  $p<0.001$ , one sample t-test).



233 **Figure 4C**), we focus on how synaptic inputs onto the plastic neuron evolve during learning. We  
234 adjust the population coupling (PC) of either the single plastic neuron ( $PC_{\text{plastic}}$ ) or the static neurons  
235 ( $PC_{\text{static}}$ ), and measure the ability of the plastic neuron to learn a stimulus association (**Methods**).  
236 We simulate perceptual learning by turning on an extra external input to all neurons in the network  
237 whenever the associated stimulus (red) is presented to the network (**Figure 4C**). We judge the plastic  
238 neuron to have learned the association if the synaptic weight from the presynaptic neuron selective to  
239 the associated stimulus becomes stronger than the weight from the presynaptic neuron (blue). We  
240 find that strongly coupling the plastic neuron to the population improves performance, while strongly  
241 coupling the static neurons to the population impairs performance (**Figure 4D**).

242 We can understand this by considering that, for learning to occur, synaptic potentiation must happen  
243 between the static neuron corresponding to the associated stimulus (red) and the plastic neuron.  
244 Increasing the plastic neuron's coupling to the rest of the population amplifies the correlation between  
245 the pre- and post- synaptic neuron when the associated stimulus is present, since the entire population  
246 receives an extra external input. On the other hand, strong coupling amongst the presynaptic static  
247 neurons decreases their stimulus selectivity, since they will be more co-active regardless of the  
248 stimulus identity. This corrupts the signal during stimulus association. These two effects combine,  
249 such that the new stimulus association is learned only when there is low population coupling amongst  
250 static neurons ( $PC_{\text{static}}$ ) and high population coupling for the plastic neuron ( $PC_{\text{plastic}}$ ) (**Figure 4D**,  
251 labelled  $\Phi$ ). In order to enhance perceptual learning with diverse learning rates, plastic neurons should  
252 therefore be more coupled to the rest of the population than stable neurons. Correlated diversity of  
253 population coupling and plasticity helps achieve this (**Figure 2E**), ensuring that neurons best suited to  
254 the necessary stimulus representation remain stable, while neurons best suited to learning stimulus  
255 associations remain flexible. The plasticity-coupling link therefore efficiently exploits the functional  
256 advantages conferred by both diverse learning rates and diverse population coupling.

## 257 **2.6 Diverse learning rates lead to networks with improved stimulus coding capabilities**

258 Until now we have considered the effect of population coupling on a network's ability to learn  
259 stimulus associations. We are also interested in the impact of population coupling on a task that  
260 does not involve synaptic plasticity, since the differences in non-specific connectivity alone may  
261 affect a neuron's computational capability. We choose stimulus decoding as a simple example, and  
262 measure performance at decoding pairs of stimuli in a static network, after it has gone through a  
263 period of synaptic plasticity (**Methods**). We compare three different network types; one which has  
264 been developed while it had only slow  $\alpha$ , one developed with only fast  $\alpha$ , and one developed with  
265 diverse  $\alpha$  (**Figure 4E**). In a network with only slow  $\alpha$ , and therefore low population coupling, stimulus  
266 decoding performs relatively well when there are high levels of noise in the input. Networks with  
267 only fast  $\alpha$  perform relatively well when there are low levels of noise. A network with diverse  $\alpha$   
268 seems to advantageously combine both of these properties, so that its performance is high across the  
269 entire range of input strength and noise levels.

## 270 **Discussion**

271 We have studied the impact of diverse learning rates in a recurrent network model of visual cortex.  
272 Intriguingly, a plasticity-coupling link emerges in networks with diverse learning rates, in which  
273 neurons with fast learning rates are more coupled to population activity than neurons with slow  
274 learning rates. We substantiated a key prediction of our plasticity-coupling link with *in vivo* calcium  
275 imaging of mouse visual cortex from the Allen Brain Observatory (**ABI, 2016**), finding that a neuron  
276 is more likely to exhibit stimulus preference variability if it has high population coupling. Based  
277 on our findings we propose that the plasticity-coupling link efficiently combines stable and flexible  
278 stimulus representation.

## 279 **3.7 Stability and plasticity of stimulus responses**

280 The architecture of a plastic substrate of neurons on top of a stable 'backbone' (**Figure 4B**) has been  
281 hypothesised before, and there is some compelling experimental evidence for this proposal (**Grosmark  
282 and Buzsaki, 2016; Clopath and Rose, 2017; Rose et al., 2016; Panas et al., 2015**). In particular,  
283 tracking of hippocampal cell assemblies reveal subsets of either plastic, highly active neurons or rigid,  
284 less active neurons (**Grosmark and Buzsaki, 2016**). Likewise, a statistical-mechanical analysis of

### Learning stimulus associations with diverse learning rates

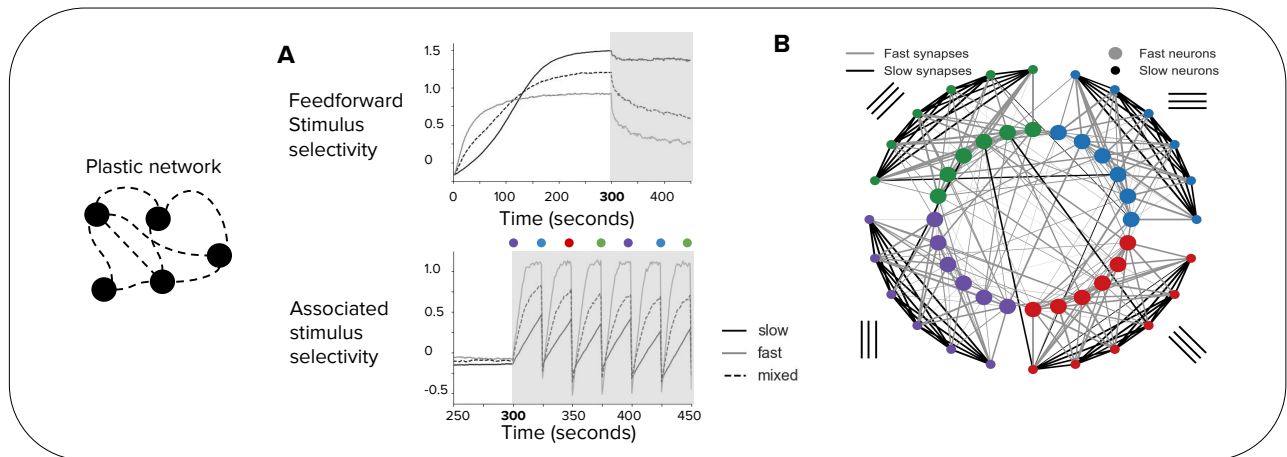

### Perceptual learning with diverse population coupling

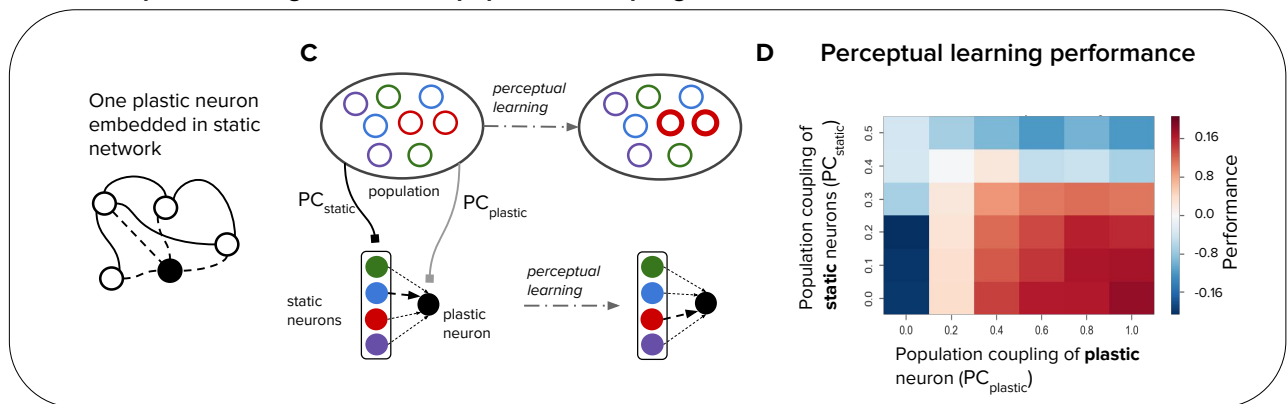

### Stimulus decoding with diverse learning rates

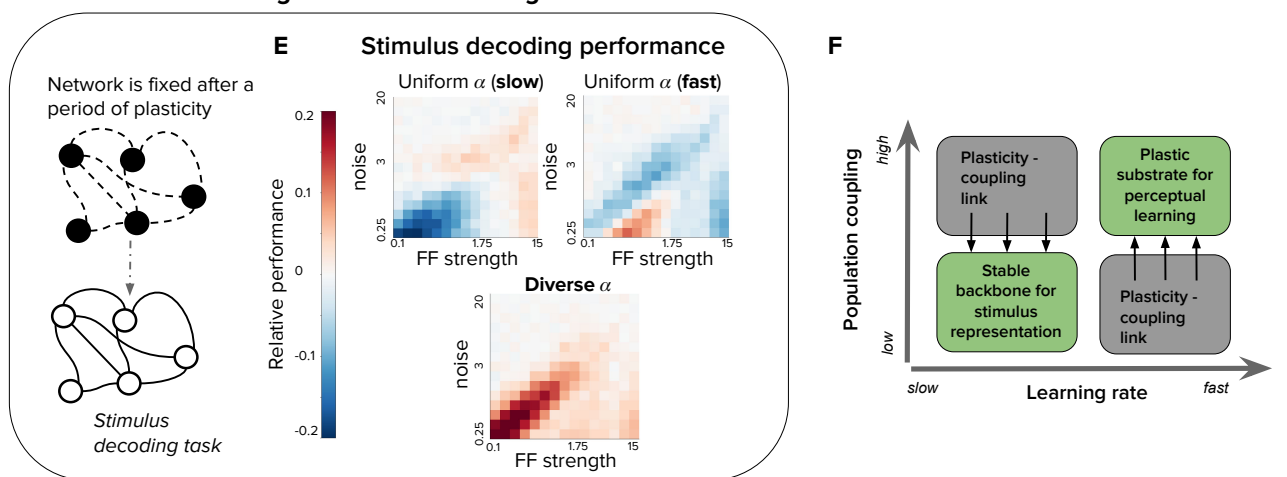

**Figure 4: Plasticity-coupling link enables both robust stimulus representation and a flexible substrate for perceptual learning** (A) The evolution of mean selectivity to the feedforward stimulus (top) and a stimulus associated with an additional external input (bottom) in networks composed either entirely of neurons with slow  $\alpha$  (black), fast  $\alpha$  (gray), or a mix of both fast and slow  $\alpha$  (dashed black). Shaded gray region indicates when the additional external input is present, and the coloured circles indicate the stimulus the external input is associated with at that time (this switches every 25 seconds) (B) Synaptic connectivity after plasticity for a network of neurons with slow (small circles) or fast (large circles) learning rates. Neurons in the network receive input selective to 1 of 4 possible stimuli (colour denotes stimulus preference). Synaptic inputs onto fast neurons and slow neurons are coloured gray and black respectively. The spatial organisation of neurons is for visualisation purposes only.

Figure 4: **(C-D)** Investigating the impact of population coupling on perceptual learning. **(C)** Coupling of either the plastic neuron or static neurons to the population is set by adjusting  $PC_{\text{plastic}}$  and  $PC_{\text{static}}$  respectively. Perceptual learning is simulated through an additional external input whenever the preferred stimulus of the red neurons is present. This leads to the predominant synaptic weight onto the plastic neuron (black) switching from the neuron with the same original preferred stimulus (blue) to the neuron with the associated preferred stimulus (red). **(D)** Amount of perceptual learning which occurs at the plastic neuron, as the population coupling of either the plastic neuron ( $PC_{\text{plastic}}$ , x-axis) or static ( $PC_{\text{static}}$ , y-axis) is varied. Perceptual learning is quantified by the ratio of the red synaptic weight (associated stimulus) to the blue synaptic weight (original preferred stimulus of the plastic neuron) after plasticity. Red regions ( $\Phi$ ) indicate successful perceptual learning, and occur only when  $PC_{\text{plastic}}$  is high and  $PC_{\text{static}}$  is low. **(E)** Relative stimulus decoding performance of fixed recurrent networks after a period of plasticity in order to develop the network. Networks were developed using either entirely neurons with fast learning rates, slow learning rates, or a 50/50 mix of both learning rates. The feedforward stimulus strength (x-axes) and noise (y-axes) were varied along a logarithmic scale. **(F)** Illustration of the synergistic effect of the plasticity-coupling link on perceptual learning. The plasticity-coupling link ensures that slow neurons have low population coupling and fast neurons have high population coupling, which panel **D** demonstrates is necessary for perceptual learning.

285 network activity in hippocampal cell cultures identified both neurons which are highly active and  
286 contribute predominantly to network stability, and neurons which exhibit more long-term activity  
287 fluctuations without compromising overall network stability (Panas et al., 2015). In primary visual  
288 cortex - which we model - neurons exhibit characteristic fluctuations of their stimulus selectivity  
289 during baseline measurements, but nonetheless tend to retain their preferred stimulus following  
290 recovery from sensory deprivation (Rose et al., 2016). This provides evidence for a stable 'backbone'  
291 of recurrent connectivity which is resistant to sensory perturbations (Clopath and Rose, 2017). Ranson  
292 (2017) investigated the stability of locomotion-dependent modulation of visual responses across  
293 14 days and, in contrast to Grosmark and Buzsaki (2016), found that highly responsive neurons  
294 exhibited reasonably stable stimulus preference while weakly responsive neurons exhibit plastic  
295 stimulus preference. However, these experiments tracked different stimulus features - and over longer  
296 timescales - when compared with our study. Moreover, our inclusion of a homeostatic inhibitory  
297 plasticity rule that precisely controls excitatory firing rate precludes us from making predictions about  
298 the dependence of a neurons average firing rate and its propensity for stimulus preference plasticity  
299 (Vogels et al., 2011). Similar links between plasticity and population dynamics could emerge in other  
300 experiments that chronically image cortical network activity (Driscoll et al., 2017; Singh et al., 2015;  
301 Peron et al., 2015)

302 Since the majority of experiments which track stimulus preference evolution do so during visual  
303 discrimination paradigms, it is likely that top-down influences such as attention or reward modulation  
304 play significant roles in their observed dynamics (Pakan et al., 2018; Caras and Sanes, 2017; Poort  
305 et al., 2015; Schoups et al., 2001). An exception is Goltstein et al. (2013), in which stimulus  
306 preference is measured in the anaesthetised state, meaning that top-down inputs are likely to be  
307 absent. Likewise, Ranson (2017) tracked stimulus response stability during passive viewing, similar  
308 to the experimental setup of the data we analyse (ABI, 2016). As well as top-down modulation,  
309 further features missing from our network model are a realistic inhibitory circuitry (Tremblay et al.,  
310 2016; Letzkus et al., 2015), and incorporating changes in network dynamics which occur during  
311 sleep (Grosmark and Buzsaki, 2016; Singh et al., 2015), both of which are widely viewed to play an  
312 important role in regulating the plasticity of neural representation.

### 313 3.8 A plasticity-coupling link *in vivo*

314 Our analysis of *in vivo* calcium imaging substantiates a key prediction of our network model by  
315 observing a correlation between the stimulus preference plasticity of a neuron and its population  
316 coupling (Figure 3D). Note that this relationship does not arise in our receptive-field network model  
317 with uniform learning rates (Figure 2E), so it is not a trivial consequence of any network model that  
318 exhibits diverse population coupling. Although the correlations we measured are quite small, this  
319 variability reflects what is observed in our network model (Figure 2E), and is not surprising given  
320 that there are likely many unobserved factors - aside from population coupling - which contribute to  
321 the dynamics of a neuron's observed stimulus response. Indeed, our network with uniform learning  
322 rates demonstrates significant stimulus response variability (Figure 2E, green), but crucially does not

323 capture the correlation between this variability and population coupling which we observe both *in*  
324 *vivo* and in the network with diverse learning rates.

325 An advantage of the Allen Brain Observatory is the large amount of data and easily replicable data  
326 processing pipeline which allows us to build upon previous work investigating population coupling  
327 in the same dataset (Sedigh-Sarvestani et al., 2017). Since the population coupling of a neuron is  
328 correlated across brain states, and is only weakly dependent on stimulus type and mean fluorescence,  
329 we believe that it provides a good measure of a neurons functional integration within the local network,  
330 and would - according to our model - therefore provide a reasonable estimate of its propensity for  
331 perceptual learning (Figure 4D) (Sedigh-Sarvestani et al., 2017; Okun et al., 2015). In agreement with  
332 our network model, and in contrast with observations from (Okun et al., 2015), population coupling  
333 is anti-correlated with orientation selectivity in the Allen Brain Observatory dataset (Figure S2).  
334 The disparity between these two experiments could be due to different experimental conditions,  
335 or the effect may not have been previously observed due to the smaller number of neurons used  
336 previously (n=431 in (Okun et al., 2015)). Moreover, our observation that the changes in stimulus  
337 preferences ( $\Delta\text{ORI}_{\text{pref}}$ ) are often non-zero but skewed towards small absolute values (Figure 3C) are  
338 in agreement with the hypothesis that stimulus preference is a slowly drifting property (Rose et al.,  
339 2016). Unfortunately, the experimental protocol limits us to directly comparing stimulus preference at  
340 only two timepoints; the beginning and end of a 62 minute imaging session (Figure 3A). Nonetheless,  
341 significant changes in synaptic efficacies can be expressed within this time (Meyer et al., 2014). We  
342 hope that these findings will stimulate further experiments that allow us to more precisely test for the  
343 presence of a plasticity-coupling link across longer timepoints, and during learning.

### 344 3.9 Population coupling and neuron function

345 Our network model provides a parsimonious explanation for the diverse population coupling recently  
346 observed in sensory cortex (Okun et al., 2015). Population coupling is dependent on the amount of  
347 recurrent synaptic input a neurons receives, in agreement with experimental data (Figure 2C). Note  
348 that this dependence is not present in networks with uniform learning rates, even though they too  
349 exhibit diverse population coupling. Moreover, the width of the population coupling distribution  
350 increases as the recurrent network approaches a dynamic regime dominated by high noise and  
351 diverse selectivity, typical in cortical networks (Figure 2F). These findings suggest that different  
352 population couplings may simply be a feature of varying learning rates and does not necessarily  
353 mean (although we cannot exclude it) that the observed diversity reflects entirely different cell classes.  
354 Furthermore, one can imagine alternative mechanisms that lead to diverse population coupling in  
355 recurrent networks, such as imposing heterogeneous targets for the number of synaptic inputs received  
356 by each neuron. Investigating such alternative mechanisms was outside the scope of our study, but  
357 would provide an interesting avenue for further theoretical research.

358 The proposed plasticity-coupling link presents a counterintuitive interpretation of the role of ‘soloists’  
359 and ‘choristers’ originally described by Okun et al. (2015). While one may naively suppose that the  
360 weakly coupled ‘soloists’ are suited to undergo plasticity during learning, we propose that it is in fact  
361 the strongly coupled ‘choristers’ with a more plastic representation.

362 The functional impact of population coupling on learning is crucial: in order to enhance perceptual  
363 learning, plastic neurons in recurrent networks should be more coupled to the rest of the population  
364 than stable neurons (Figure 4D,F). We find that high population coupling helps plastic neuron change  
365 their stimulus preference towards an associated stimulus, but hinders the ability of stable neurons to  
366 provide an instructive signal for learning. Correlated diversity of population coupling and learning  
367 rate therefore enables both robust stimulus representation (low  $\alpha$ , PC) and a flexible substrate suitable  
368 for perceptual learning (high  $\alpha$ , PC). Strikingly, this relationship is precisely what the predicted  
369 plasticity-coupling link ensures (Figure 4E). Moreover, a recent theoretical study of sensory decoding  
370 proposed that untuned neurons contribute to decoding when they are correlated with tuned neurons  
371 Zylberberg (2017). Again, this is the relationship predicted by our model, since plastic neurons are  
372 less tuned than rigid neurons and are more strongly coupled to the population (Figure 1D,E).

### 373 3.10 Previous theoretical work

374 There are many previous theoretical explorations of how diversity in the synaptic plasticity of in-  
375 dividual neurons affects learning. A recent study proposes a conceptually similar mechanism for

376 modulating the stability or flexibility of memory formation, by implementing either symmetric or  
377 asymmetric STDP learning rules (Park et al., 2017). Diversity in synaptic learning rates was also  
378 explored within the traditional machine learning framework, whereby fast weights store temporary  
379 memories of recent events, compared with slow weights which capture regularities in input structure  
380 (Ba et al., 2016). Our work is related to previous approaches for overcoming catastrophic forgetting,  
381 which is often observed in neural networks during learning (Grossberg, 1987; Carpenter and Gross-  
382 berg, 1987; McClelland et al., 1995; Fusi et al., 2005; Roxin and Fusi, 2013; Benna and Fusi, 2016).  
383 These approaches typically involve partitioning memories across timescales by implementing either  
384 synaptic states with different timescales, or neural architectures with different timescales. Here, we  
385 instead based our approach on experimental observations that suggest diverse learning rates within a  
386 sensory cortical network (Ranson, 2017; Clopath and Rose, 2017; Rose et al., 2016; Poort et al., 2015;  
387 Lütcke et al., 2013). Finally, individual synaptic updates in our model are defined by the learning rate  
388 of the postsynaptic neuron (Equation 3). Further work could explore whether our observed outcomes  
389 change if updates are instead dependent on the learning rate of the presynaptic neuron.

390 The plasticity-coupling link's impact on perceptual learning suggests a dichotomy of roles amongst  
391 neurons in a network, tied to a particular functional architecture: a stable 'backbone' of stimulus  
392 representation formed by neurons with slow synaptic plasticity and low population coupling, on top  
393 of which lies a flexible substrate of neurons with fast synaptic plasticity and high population coupling.  
394 Diverse learning rates naturally enable this architecture, and offer a compelling candidate mechanism  
395 for mediating both forms of diversity - population coupling and stimulus response stability - recently  
396 observed in cortical networks. Finally, the plasticity-coupling link provides neuroscientists with a  
397 means to assess the tendency of particular neurons to influence future learning: those which are highly  
398 coupled to population activity are most likely to express plasticity. Ongoing advances in chronic  
399 multi-neuron calcium imaging, alongside neuron-specific optogenetic stimulation, will allow us to  
400 further probe and exploit these possibilities.



## 401 Methods

402 Our network model simulations were written in python with numpy and scipy.

### 403 4.11 Neuron model

404 For both the fully connected and the receptive field networks we use a simple firing rate neuron model,  
 405 given by the transfer function  $g(x)$  defined below, and as used previously by [Rajan et al. \(2010\)](#);  
 406 [Hennequin et al. \(2014\)](#).

$$\begin{aligned} g(x) &= 0 \text{ if } x < 0 \\ &= (r_{\max} - r_0) \tanh(x / (r_{\max} - r_0)) \text{ if } x \geq 0. \end{aligned} \quad (1)$$

407 This leads to firing rates with a baseline of  $r_0$  and a maximum of  $r_{\max}$ . Following [Rajan et al. \(2010\)](#),  
 408 the firing rates  $y_i$  of neuron  $i$  driven by external input  $H_i$  in a network are described below.

$$\frac{dy_i}{dt} = -y_i + \sum_{j=1}^N W_{ij} g(y_j) + H_i, \quad (2)$$

409 where  $W_{ij}$  is the weight of the synaptic connection from neuron  $j$  to neuron  $i$ .

### 410 4.12 Modelling synaptic plasticity with diverse learning rates

411 We use a simple Hebbian learning rule with homeostatic synaptic scaling to model synaptic plasticity  
 412 of recurrent excitatory to excitatory (E-E) synapses ([Gerstner and Kistler, 2002](#)),

$$\frac{dW_{ij}^{EE}}{dt} = \alpha_i y_i y_j - \zeta \left( \sum_{k=1}^{N_E} W_{ik}^{EE} - W_{\text{total}}^{EE} \right) \quad (3)$$

413 where  $\alpha_i$  is the learning rate of the postsynaptic neuron and  $y_j$  and  $y_i$  are the activities of the pre- and  
 414 postsynaptic neuron respectively.  $\zeta$  is the time constant of synaptic scaling, and  $W_{\text{total}}^{EE}$  is the target  
 415 amount of total recurrent synaptic input which each neuron can receive under the synaptic scaling  
 416 rule.

417 This form of excitatory plasticity introduces competition amongst presynaptic synaptic weights and  
 418 leads to the development of stimulus selectivity, as discussed in [Ko et al. \(2013\)](#). We use a homeostatic  
 419 rule to model inhibitory synaptic plasticity of recurrent inhibitory to excitatory (I-E) weights ([Vogels](#)  
 420 [et al., 2011](#)),

$$\frac{dW_{ij}^{IE}}{dt} = \eta y_j (y_i - y_0), \quad (4)$$

421 where  $y_0$  is the homeostatic target firing rate,  $\eta$  is the learning rate, and  $W_{ij}^{IE}$  is the weight of the  
 422 synaptic connection from inhibitory neuron  $j$  to excitatory neuron  $i$ .

423 Excitatory weights are bounded so that their values lie between 0 and  $w_{\max}$ , and inhibitory weights  
 424 are bounded so that they lie between  $-w_{\max\text{-inh}}$  and 0.

425 While including two homeostatic mechanisms in our network model may seem redundant, they play  
 426 different regulatory roles. Inhibitory plasticity largely controls the balance of excitation and inhibition  
 427 received by a neuron, ensuring that it operates within its dynamic range. Synaptic scaling ensures  
 428 that the total amount of recurrent excitation in the network is kept fixed as we vary its external input,  
 429 while also introducing competition between presynaptic weights so that stimulus selectivity emerges.  
 430 The synergistic effect of including multiple forms of plasticity has been widely studied in theoretical  
 431 studies ([Zenke et al., 2015](#); [Litwin-Kumar and Doiron, 2014](#); [Triesch, 2007](#); [Clopath et al., 2016](#)).

432 Note that the speed of all learning rates  $\alpha$ ,  $\zeta$ , and  $\eta$  are artificially increased in order to reduce the  
 433 computational times resources required to simulate our network model. The timescales of synaptic  
 434 plasticity in our network models are in the order of hundreds of seconds, while synaptic plasticity

435 during perceptual learning occurs over the course of days in vivo. This increased learning rate  
 436 does not qualitatively affect our results, as there is a sufficient separation of timescales between  
 437 synaptic plasticity and network dynamics, and is a standard assumption in network models of synaptic  
 438 plasticity (Zenke et al., 2015; Litwin-Kumar and Doiron, 2014).

#### 439 4.13 Fully connected network model

440 The fully connected network consists of  $N_E$  excitatory neurons and a global inhibitory neuron  
 441 ( $N_I = 1$ ). The dynamics of both inhibitory (I) and excitatory (E) neurons are described by Equation 1  
 442 and Equation 2. There is dense all-to-all synaptic connectivity in the E-E, E-I and I-E populations,  
 443 and no I-I connectivity. Self-connections, or autapses, are not permitted in this network.  $W$  in  
 444 Equation 2 is a square matrix with  $(N_E + N_I)^2$  elements.

445 For Figure 1 we use a network with 48 excitatory neurons, and 4 input stimuli. Each neuron  $i$  has a  
 446 preferred stimulus  $\theta_i^{\text{pref}}$ , such that there are 12 neurons corresponding to each input stimulus. Each  
 447 neuron receives its preferred stimulus input  $H_{\text{stim}}$ , and an independent noise source generated by an  
 448 Ornstein-Uhlenbeck process, OU, with a mean of 0, variance of  $\sigma_{\text{OU}}$  and correlation time  $\tau_{\text{OU}}$ . The  
 449 external input  $H_i$  to a neuron  $i$  is therefore given by

$$H_i(t) = \delta(\theta_i^{\text{pref}} - \theta_{\text{input}}(t))H_{\text{stim}} + \text{OU}_i(t). \quad (5)$$

450 For Figure 1B-D, these input groups are further divided so that there are 6 slow neurons (with  
 451  $\alpha_i = \alpha_s$ ) and 6 fast neurons (with  $\alpha_i = 5\alpha_s$ ) per group. For Figure 1E, each input group of 12  
 452 neurons contains a single neuron corresponding to each of the 12 learning rates. The learning rates  
 453 are logarithmically spaced between  $0.5\alpha_s$  and  $75\alpha_s$ .

454 All excitatory-to-inhibitory synapses are uniformly initialised with weights  $W_{\text{init}}^{\text{EE}}$ , excitatory-to-  
 455 inhibitory synapses with weights  $W_{\text{init}}^{\text{EI}}$ , and inhibitory-to-excitatory synapses with weights  $W_{\text{init}}^{\text{IE}}$ . We  
 456 simulate the evolution of synaptic weights during visually evoked activity by sequentially presenting  
 457 the network with a randomly chosen stimulus from the 4 input stimuli. Each stimulus is presented for  
 458 500 ms. The total simulation time is 500 seconds, and synaptic weights are updated at each timestep  
 459 with the learning rules given by Equation 3 and Equation 4.

460 For Figure 1D, connection specificity is defined as the average ratio of specific to non-specific  
 461 excitatory synaptic weights received by neurons. Synaptic inputs from neurons in the same input  
 462 stimulus group as the postsynaptic neuron are specific (i.e. they share the same feedforward stimulus  
 463 preference), while all other synaptic inputs are non-specific. Specificity fluctuations are defined as  
 464 the standard deviation of the connection specificity over time, where specificity is sampled every  
 465 second from 200 to 500 seconds.

Table 1: **Simulation Parameters**

|                      |                         |                      |                       |                                |                         |                               |         |
|----------------------|-------------------------|----------------------|-----------------------|--------------------------------|-------------------------|-------------------------------|---------|
| $H_{\text{stim}}$    | 8                       | $r_0$                | 1.0                   | $r_{\text{max}}$               | 20.0                    | $dt$                          | 0.05 ms |
| $\alpha_s$           | $2.0 \times 10^{-6}$ Hz | $\zeta$              | $2 \times 10^{-4}$ Hz | $\eta$                         | $1.0 \times 10^{-5}$ Hz | $y_0$                         | 5       |
| $w_{\text{max}}$     | 0.042                   | $w_{\text{max-inh}}$ | 50                    | $W_{\text{total}}^{\text{EE}}$ | 0.75                    |                               |         |
| $\sigma_{\text{OU}}$ | 1                       | $\tau_{\text{OU}}$   | 10 ms                 | $W_{\text{init}}^{\text{EE}}$  | $0.5w_{\text{max}}$     | $W_{\text{init}}^{\text{IE}}$ | 0.2     |

#### 466 4.14 Measuring population coupling

467 As introduced by Okun et al. (2015), the population coupling  $\text{PC}_i$  of a neuron  $i$  is measured by  
 468 calculating the Pearson correlation coefficient of each neurons' activity  $x_i$  with the average activity  
 469 of the rest of the population;

$$\text{PC}_i = \text{corr}\left(x_i, \frac{1}{N-1} \sum_{j \neq i}^N x_j\right). \quad (6)$$

470 Synaptic weights are kept fixed during the population coupling measurement, while external input is  
 471 as in Equation 5. We measured population coupling using 250 seconds of activity.

#### 472 4.15 Receptive-field based network model

473 For [Figure 2](#), we adapt a previously developed model of receptive field properties in mouse visual  
474 cortex ([Watanabe et al., 2016](#)). We add neuronal dynamics and, beginning with uniform connectivity,  
475 simulate synaptic plasticity as visual stimuli are presented to the network. This model is constructed  
476 by assigning receptive fields to each excitatory neuron from a 2D Gabor function,

$$\begin{aligned} \text{RF}(x', y') &= A \exp\left(\frac{-x'^2}{2\sigma_x^2} - \frac{-y'^2}{2\sigma_y^2}\right) \cos(2\pi f x' + \phi) \\ x' &= x \cos\theta - y \sin\theta \\ y' &= x \sin\theta + y \cos\theta \end{aligned} \quad (7)$$

477 where  $A$  is the amplitude,  $\sigma_x$  and  $\sigma_y$  are the standard deviations of the Gaussian,  $\theta$  is the orientation,  
478  $f$  is the frequency and  $\phi$  is the phase of the receptive field. A network of 250 excitatory neurons with  
479 receptive fields is randomly generated from [Equation 7](#), with  $f = 2$ ,  $\sigma_x = \sigma_y = 0.5$ ,  $\phi \sim (0, 2\pi)$ ,  
480  $\theta \sim \{\pi/4, \pi/2, 3\pi/4, \dots, 2\pi\}$ . As in the previous network, there is a single inhibitory neuron which  
481 all excitatory neurons project to, and receive inhibition from.

482 Neurons are rate-based and have similar dynamics as in the simple network model ([Equa-  
483 tion 1, Equation 2](#)). Synaptic plasticity is also governed by the same learning rules ([Equa-  
484 tion 3, Equation 4](#)). Inputs are presented to the network in the form of 2D images, and the input to  
485 each neuron  $i$  for a given image  $I_{\text{ext}}$  is determined by the pixel-wise dot product of that image with  
486 the neurons' receptive field  $\text{RF}_i$ , in addition to an independent noise term for each neuron given by  
487 an Ornstein-Uhlenbeck process;

$$H_i(t) = I_{\text{ext}} \cdot \text{RF}_i + \text{OU}_i(t). \quad (8)$$

488 All excitatory-to-inhibitory synapses are uniformly initialised with weights  $W_{\text{mit-RF}}^{\text{EE}}$  and inhibitory-  
489 to-excitatory synapses with weights  $W_{\text{mit-RF}}^{\text{IE}}$ . We simulate the evolution of synaptic weights during  
490 visually-evoked activity by sequentially presenting the network with randomly chosen bars of different  
491 orientations. Each image is presented for 500 ms. The total simulation time is 500 seconds, and  
492 synaptic weights are updated at each timestep. All results in [Figure 2](#) are pooled from 15 independent  
493 network instances, with 250 excitatory neurons in each network instance.

494 We define the selectivity of each neuron as  $\bar{w}_{\text{specific}} - \bar{w}_{\text{non-specific}}$ , where  $w_{\text{specific}}$  are the synaptic  
495 weights from neurons which share the same receptive field orientation and  $w_{\text{non-specific}}$  are the synaptic  
496 weights from neurons which have a different receptive field orientation.

#### 497 4.16 The Allen Brain Observatory: 2-photon calcium imaging of visual responses *in vivo*

498 We use data from the Allen Brain Observatory, a publicly available and curated survey of neural  
499 activity in adult mouse visual cortex. A comprehensive description of the experimental methods, data  
500 acquisition and data analyses are available as white papers published by the Allen Brain Institute  
501 ([ABI, 2016](#)).

502 Briefly, GCaMP6F was expressed in forebrain excitatory neurons of transgenic mice line Ai93.  
503 Cranial surgery was performed to insert a window between p37-p63, followed by 2 weeks of  
504 habituation to the experiment setting. Mice were head-fixed on top of a rotating disk and could  
505 walk freely. 2-photon imaging experiments were conducted as the mouse passively viewed the  
506 stimulus protocol on a screen. The stimulus protocols included in our analysis consisted of either  
507 i) 10 minutes of drifting gratings, followed by 42 minutes of interleaved natural movies, drifting  
508 gratings and spontaneous activity, followed by another 10 minutes of drifting gratings, or ii) 8  
509 minutes of static gratings, followed by 45 minutes of interleaved natural movies, static gratings  
510 and spontaneous activity, followed by 9 minutes of static gratings ([Figure 3A](#), see white paper for  
511 further details). Drifting gratings were presented at 8 uniformly separated directions and at 5 different  
512 temporal frequencies. Static gratings were presented at 6 uniformly separated orientations separated,  
513 5 different spatial frequencies and 4 different phases. 112 imaging experiments were initially included  
514 in our analysis.

#### 515 4.17 Measuring population coupling and stimulus response variability *in vivo*

516 The Allen Brain Institute API provides functions which allow us to extract fluorescence traces  
517 and measure average stimulus response properties of individual cells during an experiment ([ABI,](#)

518 2016). Motion correction, ROI detection and segmentation, and the removal of neuropil fluorescence  
 519 artefacts are automatically performed using the API. We customised scripts within this API so that  
 520 we could measure population coupling and stimulus response properties under specific conditions  
 521 and timeframes.

522 We measure population coupling similarly to the network model analysis (Equation 6), but where a  
 523 neuron's activity is represented by calcium fluorescence  $dF/F$ . To ensure a reliable estimate of the  
 524 population activity when calculating population coupling, we exclude any experiments in which less  
 525 than 50 neurons were recorded. We also exclude any experiments in which the population couplings  
 526 are not sufficiently consistent when using either half (randomly chosen) of the neurons to estimate  
 527 population activity ( $r^2 < 0.8$ , linear regression). This reduces the number of experiments in our  
 528 analysis from 112 to 64, for a total of 15,281 neurons.

529 We measure the preferred orientation of each neuron during both the first presentation of static  
 530 or drifting gratings ( $\text{ORI}_{\text{pref-1}}$ ), and the final presentation of static or drifting gratings ( $\text{ORI}_{\text{pref-2}}$ )  
 531 (Figure 3A). The preferred orientation is defined as the grating that evoked the largest mean response  
 532 across all trials. Note that each experiment contains only either static or drifting gratings, so there is  
 533 no overlap between these two conditions. The absolute difference in preferred orientation is calculated  
 534 as:  $\Delta\text{ORI}_{\text{pref}} = |\text{ORI}_{\text{pref-1}} - \text{ORI}_{\text{pref-2}}|$ .

#### 535 4.18 Simulating perceptual learning

536 For the perceptual learning simulation in Figure 4A, the input  $H_i$  to each neuron is simulated as before,  
 537 but with an additional term which is active whenever the stimulus associated with the additional  
 538 external input is present (Equation 9). We first simulate synaptic plasticity without any stimulus  
 539 associations for 300 seconds (i.e. with  $H_{\text{associated}} = 0$ ), and then simulate perceptual learning (with  
 540  $H_{\text{associated}} = 10$ ). The identity of the associated stimulus is changed every 25 seconds to simulate  
 541 continual learning.

$$H_i(t) = \delta(\theta_i^{\text{pref}} - \theta_{\text{input}}(t))H_{\text{stim}} + \delta(\theta^{\text{associated}} - \theta_{\text{input}}(t))H_{\text{associated}} + \text{OU}_i(t) \quad (9)$$

542 Feedforward stimulus selectivity is defined as  $\frac{\bar{w}_{\text{specific}}}{\bar{w}_{\text{non-specific}}} - 1$ , where  $w_{\text{specific}}$  are the synaptic weights  
 543 from neurons which share the same feedforward stimulus preference and  $w_{\text{non-specific}}$  are the synaptic  
 544 weights from neurons which have a different feedforward stimulus preference. Likewise, associated  
 545 stimulus selectivity is defined as  $\frac{\bar{w}_{\text{associated}}}{\bar{w}_{\text{non-associated}}} - 1$ , where  $w_{\text{associated}}$  are the synaptic weights from neurons  
 546 whose feedforward stimulus preference is the associated stimulus, and  $w_{\text{non-associated}}$  are the synaptic  
 547 weights from other neurons.

#### 548 4.19 Single plastic neuron embedded in a static network

549 In order to systematically investigate the effect of population coupling on perceptual learning, we must  
 550 keep the population coupling of both the static and plastic population fixed throughout the experiment.  
 551 Since changes in the synaptic weights connecting both these populations will alter their population  
 552 coupling, we overcome this by making these particular synapses functionally silent. That is, while  
 553 their synaptic weight is updated depending on pre- and post-synaptic activity as before (Equation 3),  
 554 these synapses do not contribute when calculating the activity of the static and plastic neurons. The  
 555 activities of the static and plastic neurons ( $y^{\text{static}}$  and  $y^{\text{plastic}}$ ) are therefore only determined by their  
 556 external input and the activities of the population ( $y^{\text{pop}}$ , Figure 4C), meaning that their population  
 557 coupling can be systematically varied:

$$\begin{aligned} \frac{dy_i^{\text{pop}}}{dt} &= -y_i^{\text{pop}} + \sum_{j=i}^N W_{ij}g(y_j^{\text{pop}}) + H_i, \\ \frac{dy_i^{\text{plastic}}}{dt} &= -y_i^{\text{plastic}} + \text{PC}_{\text{plastic}} \sum_{j=i}^N W_{ij}g(y_j^{\text{pop}}) + H_i, \\ \frac{dy_i^{\text{static}}}{dt} &= -y_i^{\text{static}} + \text{PC}_{\text{static}} \sum_{j=i}^N W_{ij}g(y_j^{\text{pop}}) + H_i. \end{aligned} \quad (10)$$

558  $W_{ij}$  is fixed for the duration of the simulation, while the synaptic weights from the static to the plastic  
559 population are updated as below;

$$\frac{dW_{ij}^{plastic}}{dt} = \alpha y_i^{static} y_j^{plastic} - \zeta \left( \sum_{k=1}^{N_{plastic}} W_{kj}^{plastic} - W_{total}^{EE} \right). \quad (11)$$

560 As before, the input  $H_i$  has an additional term which is active whenever the stimulus associated  
561 with the additional external input is present (Equation 9, i.e. whenever the red stimulus is being  
562 presented). We first simulate synaptic plasticity without any stimulus associations for 500 seconds (i.e.  
563 with  $H_{associated} = 0$ ), and then simulate perceptual learning (with  $H_{associated} = 10$ ) for 100 seconds.  
564 Perceptual learning is quantified by the ratio of the red synaptic weight (associated stimulus) to the  
565 blue synaptic weight (original preferred stimulus of the plastic neuron) after plasticity

## 566 4.20 Measuring stimulus decoding performance

567 We train a perceptron to decode the stimulus identity from the individual activity of all neurons in the  
568 network, using the scikit-learn python package. The average activity of each neuron across a 500 ms  
569 sampling period are used as inputs during training. For Figure 4E, performance at decoding pairs  
570 of stimuli simultaneously presented to the network is shown. Relative deviation from the average  
571 performance of a perceptron trained to decode pairs of stimuli (28 possible pairs from 8 stimuli) over  
572 all 3 network types is calculated. The relative deviations for each network type from the average  
573 across all networks types are shown (Figure 4E).

## 574 4.21 Code availability

575 Code will be made publicly available on github and modeldb, and can be made available to reviewers.

## 576 Acknowledgements

577 We are grateful to Tobias Rose and Alex Cayco-Gajic for their invaluable scientific feedback and  
578 comments on the manuscript. This work was funded by the Wellcome Trust and the BBSRC.

## 579 References

- 580 (2016). Allen Brain Observatory. <http://observatory.brain-map.org/visualcoding/>, (June):1–24.
- 581 Ajemian, R., D’Ausilio, A., Moorman, H., and Bizzi, E. (2013). A theory for how sensorimotor skills are learned  
582 and retained in noisy and nonstationary neural circuits. *Proceedings of the National Academy of Sciences of  
583 the United States of America*, 110(52):E5078–87.
- 584 Andermann, M. L. (2010). Chronic cellular imaging of mouse visual cortex during operant behavior and passive  
585 viewing. *Frontiers in Cellular Neuroscience*, 4(March):1–16.
- 586 Ba, J., Hinton, G., Mnih, V., Leibo, J. Z., and Ionescu, C. (2016). Using Fast Weights to Attend to the Recent  
587 Past. pages 1–9.
- 588 Benna, M. K. and Fusi, S. (2016). Computational principles of synaptic memory consolidation. *Nature  
589 neuroscience*, 19(12):1697.
- 590 Caras, M. L. and Sanes, D. H. (2017). Top-down modulation of sensory cortex gates perceptual learning.  
591 *Proceedings of the National Academy of Sciences*, 114(37):201712305.
- 592 Carptenter, G. A. and Grossberg, S. (1987). Discovering Order in Chaos: Stable Self-Organization of Neural  
593 Recognition Codes. *Annals of the New York Academy of Sciences*, 504(1):33–51.
- 594 Clopath, C., B"using, L., Vasilaki, E., and Gerstner, W. (2010). Connectivity reflects coding: a model of  
595 voltage-based {STDP} with homeostasis. *Nature neuroscience*, 13(3):344–352.
- 596 Clopath, C. and Rose, T. (2017). Variance and Invariance of Neuronal Long-term Representations. *Philosophical  
597 Transactions of the Royal Society B: Biological Sciences*.
- 598 Clopath, C., Vogels, T. P., Froemke, R. C., and Sprekeler, H. (2016). Receptive field formation by interacting  
599 excitatory and inhibitory synaptic plasticity. Technical report.



- 600 Cossell, L., Iacaruso, M. F., Muir, D. R., Houlton, R., Sader, E. N., Ko, H., Hofer, S. B., and Mrsic-fogel, T. D.  
601 (2015). Functional organization of excitatory synaptic strength in primary visual cortex. *Nature*, 518(00):1–5.
- 602 Driscoll, L. N., Pettit, N. L., Minderer, M., Chettih, S. N., and Harvey, C. D. (2017). Dynamic Reorganization of  
603 Neuronal Activity Patterns in Parietal Cortex. *Cell*, pages 986–999.
- 604 Fusi, S., Drew, P. J., and Abbott, L. F. (2005). Cascade models of synaptically stored memories. *Neuron*,  
605 45(4):599–611.
- 606 Gerstner, W. and Kistler, W. M. (2002). Mathematical formulations of Hebbian learning. *Biological cybernetics*,  
607 87(5-6):404–415.
- 608 Goltstein, P. M., Coffey, E. B. J., Roelfsema, P. R., and Pennartz, C. M. A. (2013). In Vivo Two-Photon Ca<sup>2+</sup>  
609 Imaging Reveals Selective Reward Effects on Stimulus-Specific Assemblies in Mouse Visual Cortex. *Journal*  
610 *of Neuroscience*, 33(28):11540–11555.
- 611 Grosmark, A. D. and Buzsaki, G. (2016). Diversity in neural firing dynamics supports both rigid and learned  
612 hippocampal sequences. *Science*, 351(6280):1440–1443.
- 613 Grossberg, S. (1987). Processing of expected and unexpected events during conditioning and attention: A  
614 psychophysiological theory. *Advances in Psychology*, 42(C):181–237.
- 615 Hennequin, G., Vogels, T. P., and Gerstner, W. (2014). Optimal control of transient dynamics in balanced  
616 networks supports generation of complex movements. *Neuron*, 82(6):1394–1406.
- 617 Kappel, D., Habenschuss, S., Legenstein, R., and Maass, W. (2015). Network Plasticity as Bayesian Inference.  
618 *{PLoS} computational biology*, 11(11):e1004485.
- 619 Kappel, D., Legenstein, R., Habenschuss, S., Hsieh, M., and Maass, W. (2017). Reward-based stochastic  
620 self-configuration of neural circuits. pages 1–37.
- 621 Ko, H., Cossell, L., Baragli, C., Antolik, J., Clopath, C., Hofer, S. B., and Mrsic-Fogel, T. D. (2013). The  
622 emergence of functional microcircuits in visual cortex. *Nature*, 496(7443):96–100.
- 623 Letzkus, J. J., Wolff, S. B. E., and Lüthi, A. (2015). Disinhibition, a Circuit Mechanism for Associative Learning  
624 and Memory. *Neuron*, 88(2):264–276.
- 625 Lin, I.-C., Okun, M., Carandini, M., and Harris, K. D. (2015). The Nature of Shared Cortical Variability. *Neuron*,  
626 87(3):1–13.
- 627 Litwin-Kumar, A. and Doiron, B. (2014). Formation and maintenance of neuronal assemblies through synaptic  
628 plasticity. *Nature communications*, 5(May):5319.
- 629 Lütcke, H., Margolis, D. J., and Helmchen, F. (2013). Steady or changing? Long-term monitoring of neuronal  
630 population activity. *Trends in Neurosciences*, 36(7):375–384.
- 631 Mank, M., Santos, A. F., Drenberger, S., Mrsic-Fogel, T. D., Hofer, S. B., Stein, V., Hendel, T., Reiff, D. F.,  
632 Levelt, C., Borst, A., Bonhoeffer, T., Hübener, M., and Griesbeck, O. (2008). A genetically encoded calcium  
633 indicator for chronic in vivo two-photon imaging. *Nature Methods*, 5(9):805–811.
- 634 McClelland, J. L., McNaughton, B. L., and O’Reilly, R. C. (1995). Why there are complementary learning  
635 systems in the hippocampus and neocortex: Insights from the successes and failures of connectionist models  
636 of learning and memory. *Psychological Review*, 102(3):419–457.
- 637 Meyer, D., Bonhoeffer, T., and Scheuss, V. (2014). Balance and stability of synaptic structures during synaptic  
638 plasticity. *Neuron*, 82(2):430–443.
- 639 Okun, M., Steinmetz, N. A., Cossell, L., Iacaruso, M. F., Ko, H., Barthó, P., Moore, T., Hofer, S. B., Mrsic-Fogel,  
640 T. D., Carandini, M., and Harris, K. D. (2015). Diverse coupling of neurons to populations in sensory cortex.  
641 *Nature*.
- 642 Pakan, J. M., Francioni, V., and Rochefort, N. L. (2018). Action and learning shape the activity of neuronal  
643 circuits in the visual cortex. *Current opinion in neurobiology*, 52:88–97.
- 644 Panas, D., Amin, H., Maccione, a., Muthmann, O., van Rossum, M., Berdondini, L., and Hennig, M. H. (2015).  
645 Sloppiness in Spontaneously Active Neuronal Networks. *Journal of Neuroscience*, 35(22):8480–8492.
- 646 Park, Y., Choi, W., and Paik, S.-B. (2017). Symmetry of learning rate in synaptic plasticity modulates formation  
647 of flexible and stable memories. *Scientific Reports*, 7(1):5671.

- 648 Peron, S. P., Freeman, J., Iyer, V., Guo, C., and Svoboda, K. (2015). A Cellular Resolution Map of Barrel Cortex  
649 Activity during Tactile Behavior. *Neuron*, 86(3):783–799.
- 650 Poort, J., Khan, A. G., Pachitariu, M., Nemri, A., Orsolich, I., Krupic, J., Bauza, M., Sahani, M., Keller,  
651 G. B., Mrsic-Flogel, T. D., and Hofer, S. B. (2015). Learning Enhances Sensory and Multiple Non-sensory  
652 Representations in Primary Visual Cortex. *Neuron*, 86(6):1478–1490.
- 653 Rajan, K., Abbott, L., and Sompolinsky, H. (2010). Stimulus-dependent suppression of chaos in recurrent neural  
654 networks. *Physical Review E*, 82.
- 655 Ranson, A. (2017). Stability and Plasticity of Contextual Modulation in the Mouse Visual Cortex. *Cell Reports*,  
656 18(4):840–848.
- 657 Rokni, U., Richardson, A. G., Bizzi, E., and Seung, H. S. (2007). Motor Learning with Unstable Neural  
658 Representations. *Neuron*, 54(4):653–666.
- 659 Rose, T., Jaepel, J., Hübener, M., and Bonhoeffer, T. (2016). Cell-specific restoration of stimulus preference  
660 after monocular deprivation in the visual cortex. *Science (New York, N.Y.)*, 352(6291):1319–22.
- 661 Roxin, A. and Fusi, S. (2013). Efficient Partitioning of Memory Systems and Its Importance for Memory  
662 Consolidation. *PLoS Computational Biology*, 9(7).
- 663 Schoups, A., Vogels, R., Qian, N., and Orban, G. (2001). Practising orientation identification improves orientation  
664 coding in V1 neurons. *Nature*, 412(6846):549–553.
- 665 Sedigh-Sarvestani, M., Nolte, M., and Mardoum, P. (2017). Population coupling in the mouse visual cortex. In  
666 *Computational and systems neuroscience (Cosyne)*, pages Poster III–44.
- 667 Sengpiel, F., Stawinski, P., and Bonhoeffer, T. (1999). Influence of experience on orientation maps in cat visual  
668 cortex. *Nature neuroscience*, 2(8):727.
- 669 Singh, A., Peyrache, A., and Humphries, M. D. (2015). Plasticity of a neural dictionary in prefrontal cortex.
- 670 Tremblay, R., Lee, S., and Rudy, B. (2016). GABAergic Interneurons in the Neocortex: From Cellular Properties  
671 to Circuits. *Neuron*, 91(2):260–292.
- 672 Triesch, J. (2007). Synergies between intrinsic and synaptic plasticity mechanisms. *Neural computation*,  
673 19(4):885–909.
- 674 Turrigiano, G. G., Leslie, K. R., Desai, N. S., Rutherford, L. C., and Nelson, S. B. (1998). Activity-dependent  
675 scaling of quantal amplitude in neocortical neurons. *Nature*, 391(6670):892–896.
- 676 Vogels, T. P., Sprekeler, H., Zenke, F., Clopath, C., and Gerstner, W. (2011). Inhibitory plasticity balances excitation  
677 and inhibition in sensory pathways and memory networks. *Science (New York, N.Y.)*, 334(6062):1569–  
678 1573.
- 679 Watanabe, K., Teramae, J.-n., and Wakamiya, N. (2016). *Inferred Duality of Synaptic Connectivity in Local  
680 Cortical Circuit with Receptive Field Correlation*, pages 115–122. Springer International Publishing, Cham.
- 681 Zenke, F., Agnes, E. J., and Gerstner, W. (2015). Diverse synaptic plasticity mechanisms orchestrated to form  
682 and retrieve memories in spiking neural networks. *Nature Communications*, 6:6922.
- 683 Zylberberg, J. (2017). Untuned but not irrelevant: A role for untuned neurons in sensory information coding.  
684 *bioRxiv*, pages 1–18.

## 685 Supplementary materials

### 686 Methods for **Figure S1**

687 We simulate a network of 1 postsynaptic neuron and 10 presynaptic neurons. 3 of the presynaptic neurons share  
688 the same stimulus preference as the postsynaptic neuron and the remaining have different preferred stimuli. We  
689 then identify the parameter regime in which the coupling of the single plastic neuron to the rest of the population  
690 is correlated to its learning rate. To do so, we measure the population coupling of the postsynaptic neuron for a  
691 range of different learning rates from  $0.5\alpha_s$  to  $10\alpha_s$ , using a separate network instantiation for each value of  $\alpha$ .  
692 We then estimate the slope of the relationship between population coupling and  $\alpha$  using linear regression, across  
693 a range of values for the synaptic scaling rate ( $\zeta$ ) and noise magnitude ( $\sigma_{OU}$ ).

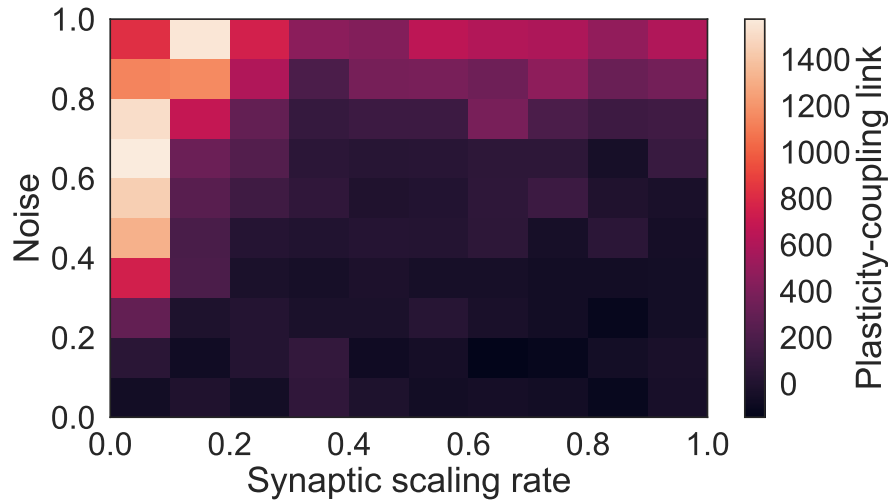

Figure S1: **Plasticity-coupling link requires moderate noise and slow synaptic scaling.** The slope of the linear dependence between  $\alpha$  and population coupling within a network with diverse  $\alpha$ , for different values of the synaptic scaling rate ( $\zeta$ ) and injected noise ( $\sigma_{OU}$ ). The presence of noise introduces transient correlations across the network which lead to fluctuations of both specific and non-specific synaptic weights. This ensures that non-specific synaptic weights do not all tend towards zero. Likewise, if synaptic scaling is too fast compared with Hebbian plasticity - contrary to experimentally observed timescales (Turrigiano et al., 1998) - then only specific synapses, which share highly correlated inputs, can sustain strong weights while non-specific synapses tend towards zero.

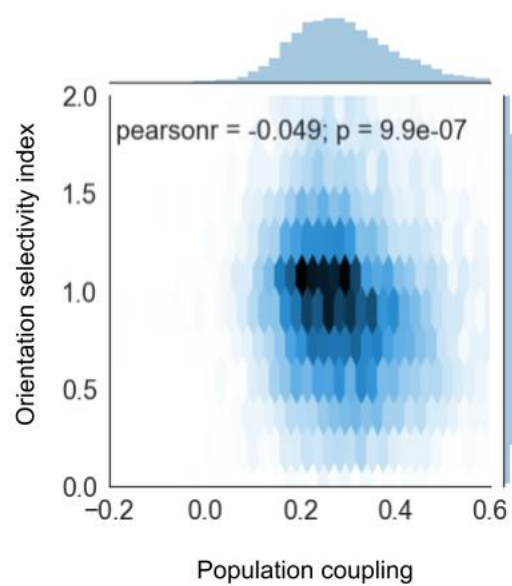

Figure S2: **Orientation selectivity index is anti-correlated with population coupling.**
